# Supplementary figures and images for: An NIR-responsive mesoporous silica nanosystem for synergetic photothermal-immunoenhancement therapy of hepatocellular carcinoma
Source: Royal Society of Chemistry journal article supplement (doi:10.1039/c9tb01891c), 2019-11-19

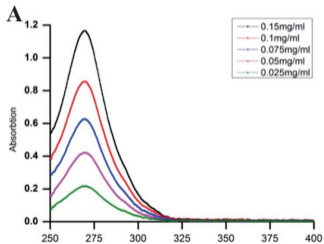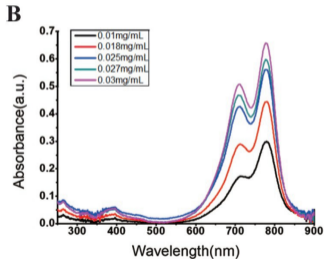

Supplement: c9tb01891c2.pdf [file c9tb01891c2.pdf]

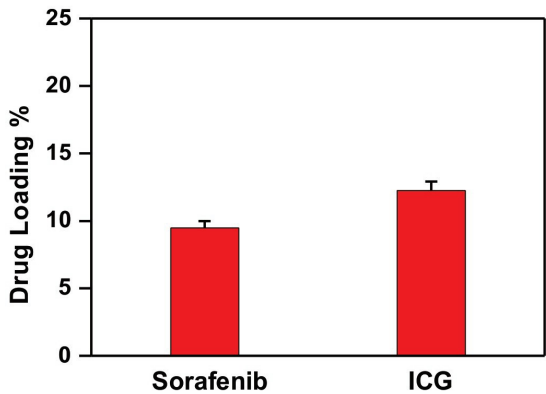

Supplement: c9tb01891c3.pdf [file c9tb01891c3.pdf]

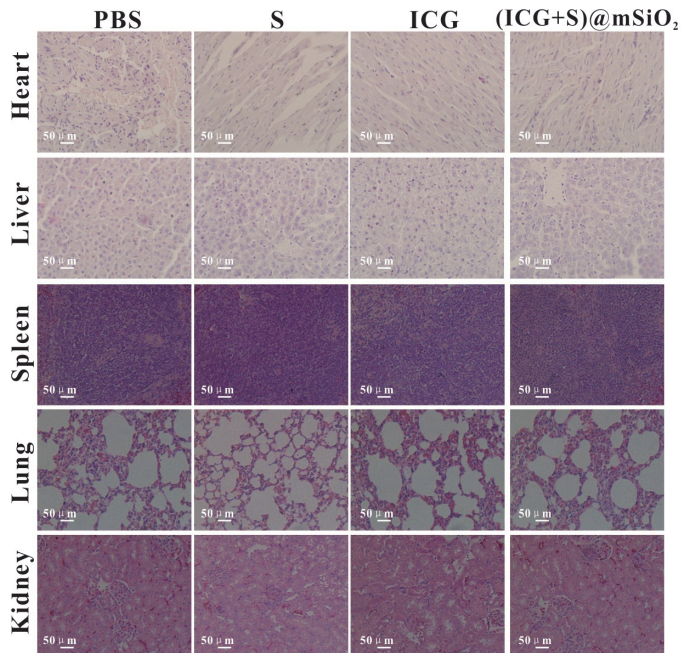

Supplement: c9tb01891c5.pdf [file c9tb01891c5.pdf]
